# Supplementary material
Source: publisher figshare collection journal article supplement (https://gsapubs.figshare.com/ndownloader/files/22756595)
Supplement: Supplementary file 1 [file 22756595]

## **DATA REPOSITORY ITEM 1 (DR-1), $^{40}\text{Ar}/^{39}\text{Ar}$ ANALYTICAL DATA**

### **$^{40}\text{Ar}/^{39}\text{Ar}$ Analytical Procedures**

Anorthoclase and sanidine concentrates were obtained using standard mineral-separation techniques, including crushing, grinding, Frantz magnetic separation, and heavy liquids. Basaltic groundmass concentrates were obtained from the 100-250  $\mu\text{m}$  fraction that behaved magnetically at 0.5 A with a 15° forward slope and a 10° side slope and nonmagnetically at 0.1 A with the same parameters. All samples were rinsed ultrasonically with acetone and deionized water to remove surface contaminants. Final mineral separates were hand picked under a binocular microscope to remove any impurities and composite or altered mineral grains. Samples were loaded in 99.99% copper foil packets that were stacked single-file in quartz vials with flux monitors between every five samples. Sanidine from the Taylor Creek Rhyolite (standard TCR-2) with an assumed age of  $27.92 \pm 0.05$  Ma (Duffield and Dalrymple, 1990) was used as a flux monitor. Samples were irradiated at the Oregon State University TRIGA reactor for 2 hours in the cadmium-shielded CLICLIT facility.

All samples were analyzed at the Stanford University Noble Gas Geochronology Laboratory. *J*-values of unknowns were interpolated from weighted-mean *J*-values calculated from multi-grain laser-fusion analyses of each monitor. Step heating experiments were carried out using a Staudacher-type double-vacuum resistance furnace, and multi-grain laser fusion experiments (sanidine and anorthoclase) were carried out using a 10W Spectra Physics argon ion laser. Extracted gas was purified using SAES getters for 5 minutes and analyzed for 10 minutes in a MAP 216 noble-gas mass spectrometer with a Johnston MM1 electron multiplier and a Baur-Signer ion source. Mass spectrometer sensitivity for typical gain values is  $\sim 5.21 \times 10^{-13}$  mol-volt<sup>-1</sup> and mass discrimination is  $\sim 286.0 \pm 0.5$  based on air analyses. Mass spectrometer dynamic blanks for  $^{40}\text{Ar}$  were  $\sim 3 \times 10^{-17}$  moles and for  $^{36}\text{Ar}$  were  $\sim 9 \times 10^{-19}$  moles. Resistance furnace static blanks for  $^{40}\text{Ar}$  ranged from  $\sim 8 \times 10^{-16}$  moles at 700°C to  $4 \times 10^{-15}$  moles at 1200°C. Laser blanks for  $^{40}\text{Ar}$  were typically  $\sim 8 \times 10^{-16}$  moles.

Raw data were trimmed and regressed to inlet time using in-house LabView® software written by M. McWilliams, and measured isotopic ratios were corrected for machine blanks, decay, and interfering reactions using an Excel® routine written by M. McWilliams. Interference correction factors are:  $(^{36}\text{Ar}/^{37}\text{Ar})_{\text{Ca}} = 2.24 \times 10^{-4}$ ;  $(^{39}\text{Ar}/^{37}\text{Ar})_{\text{Ca}} = 8.1 \times 10^{-4}$ ;  $(^{40}\text{Ar}/^{39}\text{Ar})_{\text{K}} = 3.0 \times 10^{-2}$ . Isochron plots and ages, release spectra, and plateau ages were produced using the IsoPlot 3.0 program written by K. Ludwig. All data reduction assumed a  $^{40}\text{K}$  decay constant of  $5.543 \times 10^{-10}$  yr<sup>-1</sup> (Steiger and Jäger, 1977).

Plateau ages meet the following criteria: (1) The plateau consists of 3 or more contiguous steps that comprise >60% of the total  $^{39}\text{Ar}$  released, (2) Steps are concordant at the 95% confidence interval, (3) There is no resolvable slope on the plateau, (4) There are no trends or outliers on the upper and lower steps. The inverse-isochron plot provides a critical test for the assumption that trapped argon gas has an atmospheric composition

( $^{40}\text{Ar}/^{36}\text{Ar} = 295.5$ ). Concordance of inverse-isochron ages defined by isochronous (low MSWD) data is the final criteria for defining a “true plateau” age (McDougall and Harrison, 1999). IsoPlot calculates inverse isochrones using the York (1969) regression.

We quote plateau ages in the text for step-heated samples that meet the above criteria. For samples that fail the test for a true plateau, we quote either the inverse-isochron age (for samples with low radiogenic yields), or a weighted-mean age (weighted steps with high radiogenic yields). For laser-fusion analyses, we calculate weighted-mean ages (weighted by data point errors) of 4-5 multi-grain aliquots. For all samples, the total fusion age is a weighted-mean of all heating steps or laser analyses, weighted by the percent of  $^{39}\text{Ar}$  released for each step. All quoted uncertainties are  $2\sigma$ .

## References

- Duffield, W.A. and Dalrymple, G.B., 1990, The Taylor Creek Rhyolite of New Mexico; a rapidly emplaced field of lava domes and flows: *Bulletin of Volcanology*, v. 52, p. 475-487.
- McDougall, I., and Harrison, T.M., 1999, *Geochronology and thermochronology by the  $^{40}\text{Ar}/^{39}\text{Ar}$  method*: Oxford University Press, 269 p.
- Steiger, R.H., and Jäger, E., 1977, Convention on the use of decay constants in geo- and cosmochemistry, *Earth and Planetary Science Letters*, v. 36, p. 359-362.
- York, D., 1969, Least-squares fitting of a straight line with correlated errors; *Earth and Planetary Science Letters*, v. 5, p. 320-324.

## Key to data tables

|                                 |                                                                                             |
|---------------------------------|---------------------------------------------------------------------------------------------|
| Step                            | Heating step or laser analysis number                                                       |
| Temp                            | Furnace temperature ( $^{\circ}\text{C}$ )                                                  |
| Laser #                         | Laser analysis number                                                                       |
| $^{40}\text{Ar}/^{39}\text{Ar}$ | $^{40}\text{Ar}/^{39}\text{Ar}$ ratio, corrected for blanks, decay, and mass discrimination |
| $^{37}\text{Ar}/^{39}\text{Ar}$ | $^{37}\text{Ar}/^{39}\text{Ar}$ ratio, corrected for blanks, decay, and mass discrimination |
| $^{36}\text{Ar}/^{39}\text{Ar}$ | $^{36}\text{Ar}/^{39}\text{Ar}$ ratio, corrected for blanks, decay, and mass discrimination |
| $^{39}\text{Ar}_\text{K}$       | Moles of $^{39}\text{Ar}$ produced from $^{39}\text{K}$ ( $\times 10^{-15}$ mol)            |
| K/Ca                            | K/Ca ratio calculated from the production of $^{37}\text{Ar}$                               |
| $^{40}\text{Ar}^*$              | Radiogenic $^{40}\text{Ar}$ (%)                                                             |
| Age                             | Age of each heating step or laser analysis ( $\text{Ma} \pm 1\sigma$ )                      |

DL03-BR11 wrb

Total Fusion Age: 32.8 ± 0.5 Ma

J = 0.0005311 ± 0.7%

| Step | Temp<br>(°C) | <sup>40</sup> Ar/ <sup>39</sup> Ar | <sup>37</sup> Ar/ <sup>39</sup> Ar | <sup>36</sup> Ar/ <sup>39</sup> Ar | <sup>39</sup> Ar <sub>K</sub><br>x 10 <sup>-15</sup> mol | K/Ca  | <sup>40</sup> Ar*<br>(%) | <sup>39</sup> Ar(%)<br>(%) | Age<br>(Ma) | ± 1σ |
|------|--------------|------------------------------------|------------------------------------|------------------------------------|----------------------------------------------------------|-------|--------------------------|----------------------------|-------------|------|
| 1    | 550          | 653.67                             | 2.1250                             | 2.1706                             | 0.6307                                                   | 0.230 | 1.9%                     | 1.5%                       | 11.84       | 7.43 |
| 2    | 600          | 194.50                             | 2.2912                             | 0.5791                             | 0.4623                                                   | 0.213 | 12.1%                    | 2.7%                       | 22.40       | 3.01 |
| 3    | 650          | 126.29                             | 2.3037                             | 0.3519                             | 0.5309                                                   | 0.212 | 17.8%                    | 4.1%                       | 21.40       | 2.26 |
| 4    | 700          | 99.15                              | 2.1546                             | 0.2464                             | 0.6369                                                   | 0.227 | 26.7%                    | 5.7%                       | 25.21       | 1.44 |
| 5    | 750          | 69.83                              | 1.8170                             | 0.1289                             | 0.8992                                                   | 0.269 | 45.6%                    | 7.9%                       | 30.28       | 0.91 |
| 6    | 800          | 51.78                              | 1.5339                             | 0.0579                             | 1.5509                                                   | 0.319 | 67.2%                    | 11.8%                      | 33.03       | 0.55 |
| 7    | 850          | 45.74                              | 1.2416                             | 0.0326                             | 2.4516                                                   | 0.394 | 79.1%                    | 18.0%                      | 34.36       | 0.40 |
| 8    | 900          | 46.25                              | 1.0198                             | 0.0357                             | 2.7247                                                   | 0.480 | 77.3%                    | 24.8%                      | 33.94       | 0.38 |
| 9    | 950          | 54.59                              | 0.9313                             | 0.0660                             | 2.8175                                                   | 0.526 | 64.4%                    | 31.9%                      | 33.36       | 0.47 |
| 10   | 1000         | 47.52                              | 1.0621                             | 0.0427                             | 3.7072                                                   | 0.461 | 73.6%                    | 41.1%                      | 33.19       | 0.39 |
| 11   | 1050         | 42.14                              | 1.2574                             | 0.0258                             | 3.0969                                                   | 0.389 | 82.1%                    | 48.9%                      | 32.86       | 0.35 |
| 12   | 1100         | 42.85                              | 1.0083                             | 0.0257                             | 3.8361                                                   | 0.486 | 82.4%                    | 58.5%                      | 33.53       | 0.32 |
| 13   | 1150         | 41.90                              | 1.2411                             | 0.0203                             | 6.0117                                                   | 0.394 | 85.9%                    | 73.6%                      | 34.15       | 0.29 |
| 14   | 1200         | 39.23                              | 5.0306                             | 0.0151                             | 4.7466                                                   | 0.097 | 89.4%                    | 85.6%                      | 33.42       | 0.30 |
| 15   | 1300         | 42.21                              | 11.3799                            | 0.0258                             | 5.7078                                                   | 0.043 | 83.7%                    | 100.0%                     | 33.83       | 0.32 |

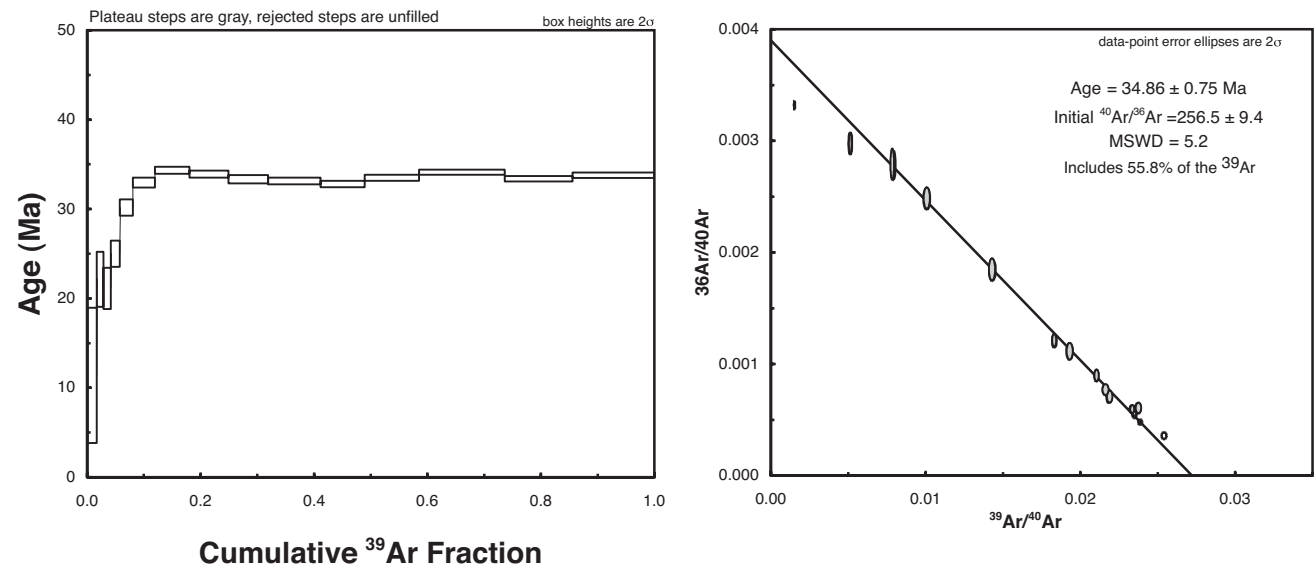

| Step | Laser<br>(#) | <sup>40</sup> Ar/ <sup>39</sup> Ar | <sup>37</sup> Ar/ <sup>39</sup> Ar | <sup>36</sup> Ar/ <sup>39</sup> Ar | <sup>39</sup> Ar <sub>K</sub><br>x 10 <sup>-15</sup> mol | K/Ca   | <sup>40</sup> Ar*<br>(%) | <sup>39</sup> Ar(%)<br>(%) | Age<br>(Ma) | ± 1σ |
|------|--------------|------------------------------------|------------------------------------|------------------------------------|----------------------------------------------------------|--------|--------------------------|----------------------------|-------------|------|
| 1    | 1            | 27.86                              | 0.0132                             | 0.0040                             | 17.2788                                                  | 37.028 | 95.8%                    | 34.8%                      | 24.99       | 0.20 |
| 2    | 2            | 28.48                              | 0.0113                             | 0.0066                             | 12.0152                                                  | 43.526 | 93.2%                    | 59.0%                      | 24.86       | 0.23 |
| 3    | 3            | 30.11                              | 0.0143                             | 0.0120                             | 8.9757                                                   | 34.384 | 88.2%                    | 77.0%                      | 24.88       | 0.25 |
| 4    | 4            | 28.05                              | 0.0302                             | 0.0051                             | 11.4135                                                  | 16.237 | 94.6%                    | 100.0%                     | 24.85       | 0.22 |

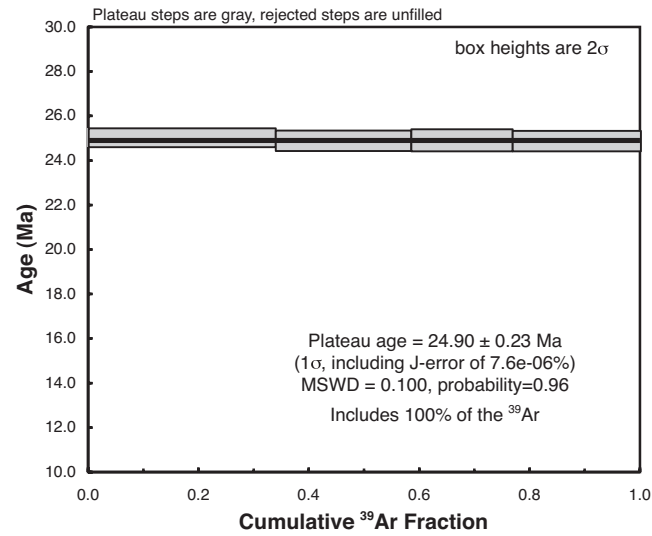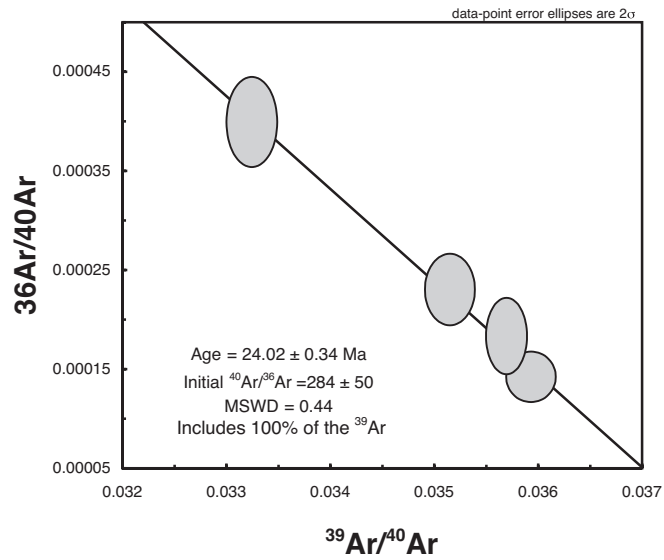

| Step | Laser<br>(#) | <sup>40</sup> Ar/ <sup>39</sup> Ar | <sup>37</sup> Ar/ <sup>39</sup> Ar | <sup>36</sup> Ar/ <sup>39</sup> Ar | <sup>39</sup> Ar <sub>K</sub><br>x 10 <sup>-15</sup> mol | K/Ca   | <sup>40</sup> Ar*<br>(%) | <sup>39</sup> Ar(%)<br>(%) | Age<br>(Ma) | ± 1σ |
|------|--------------|------------------------------------|------------------------------------|------------------------------------|----------------------------------------------------------|--------|--------------------------|----------------------------|-------------|------|
| 1    | 1            | 28.10                              | 0.0542                             | 0.0044                             | 7.4049                                                   | 9.038  | 95.4%                    | 31.2%                      | 25.23       | 0.24 |
| 2    | 2            | 28.31                              | 0.0088                             | 0.0054                             | 5.6025                                                   | 55.719 | 94.4%                    | 54.8%                      | 25.16       | 0.27 |
| 3    | 3            | 28.54                              | 0.0474                             | 0.0057                             | 8.9757                                                   | 10.333 | 94.1%                    | 78.7%                      | 25.27       | 0.28 |
| 4    | 4            | 28.21                              | 0.0521                             | 0.0049                             | 5.0633                                                   | 9.408  | 94.8%                    | 100.0%                     | 25.18       | 0.29 |

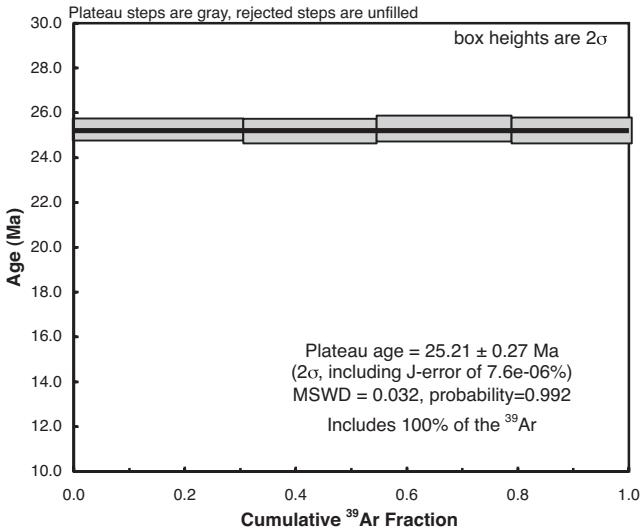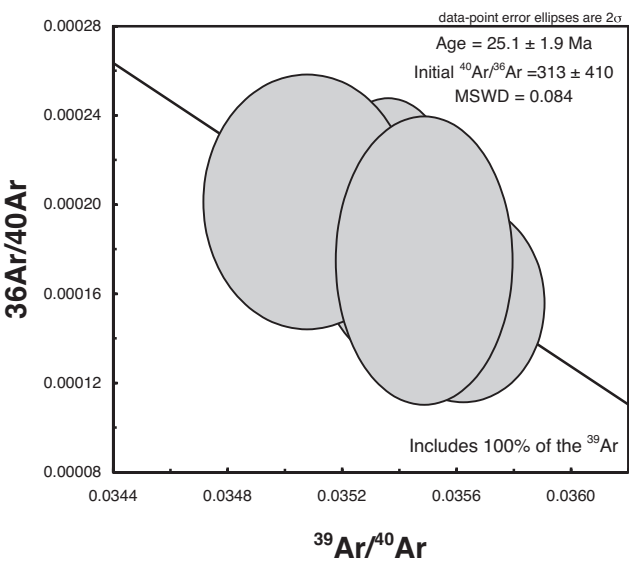

DL03-BR31 wrb

Total Fusion Age: 23.3 ± 0.3 Ma

J = 0.0005325 ± 0.7%

| Step | Temp<br>(°C) | <sup>40</sup> Ar/ <sup>39</sup> Ar | <sup>37</sup> Ar/ <sup>39</sup> Ar | <sup>36</sup> Ar/ <sup>39</sup> Ar | <sup>39</sup> Ar <sub>K</sub><br>x 10 <sup>-15</sup> mol | K/Ca  | <sup>40</sup> Ar*<br>(%) | <sup>39</sup> Ar(%)<br>(%) | Age<br>(Ma) | ± 1σ  |
|------|--------------|------------------------------------|------------------------------------|------------------------------------|----------------------------------------------------------|-------|--------------------------|----------------------------|-------------|-------|
| 1    | 550          | 1275.00                            | 1.4785                             | 4.3581                             | 0.2870                                                   | 0.331 | 2.3%                     | 0.2%                       | 27.36       | 38.52 |
| 2    | 600          | 429.06                             | 1.6835                             | 1.4268                             | 0.2071                                                   | 0.291 | 4.9%                     | 0.4%                       | 20.16       | 15.84 |
| 3    | 650          | 249.14                             | 1.5758                             | 0.7732                             | 0.3032                                                   | 0.311 | 11.3%                    | 0.7%                       | 26.82       | 6.84  |
| 4    | 700          | 139.30                             | 1.5702                             | 0.4011                             | 0.5315                                                   | 0.312 | 17.7%                    | 1.1%                       | 23.54       | 3.02  |
| 5    | 750          | 85.95                              | 1.4478                             | 0.2222                             | 0.9596                                                   | 0.338 | 26.2%                    | 2.0%                       | 21.46       | 1.94  |
| 6    | 800          | 65.65                              | 1.2486                             | 0.1436                             | 1.5029                                                   | 0.392 | 37.6%                    | 3.2%                       | 23.53       | 1.10  |
| 7    | 850          | 56.52                              | 1.0112                             | 0.1054                             | 2.0829                                                   | 0.484 | 46.8%                    | 5.0%                       | 25.20       | 0.91  |
| 8    | 900          | 41.31                              | 0.8644                             | 0.0549                             | 3.6622                                                   | 0.566 | 62.1%                    | 8.0%                       | 24.48       | 0.53  |
| 9    | 950          | 39.63                              | 1.0260                             | 0.0594                             | 8.1456                                                   | 0.477 | 57.3%                    | 14.9%                      | 21.69       | 0.27  |
| 10   | 1000         | 26.93                              | 0.8800                             | 0.0077                             | 14.1077                                                  | 0.556 | 92.0%                    | 26.8%                      | 23.64       | 0.20  |
| 11   | 1050         | 25.46                              | 0.7844                             | 0.0032                             | 16.6320                                                  | 0.624 | 96.7%                    | 40.8%                      | 23.48       | 0.19  |
| 12   | 1100         | 25.67                              | 0.5757                             | 0.0039                             | 17.8174                                                  | 0.851 | 95.8%                    | 55.8%                      | 23.44       | 0.18  |
| 13   | 1150         | 26.21                              | 0.4690                             | 0.0056                             | 16.5156                                                  | 1.044 | 94.0%                    | 69.7%                      | 23.50       | 0.20  |
| 14   | 1200         | 25.41                              | 1.1607                             | 0.0041                             | 12.6943                                                  | 0.422 | 95.6%                    | 80.4%                      | 23.19       | 0.20  |
| 15   | 1300         | 25.79                              | 3.1681                             | 0.0063                             | 23.1320                                                  | 0.154 | 93.8%                    | 100.0%                     | 23.11       | 0.18  |

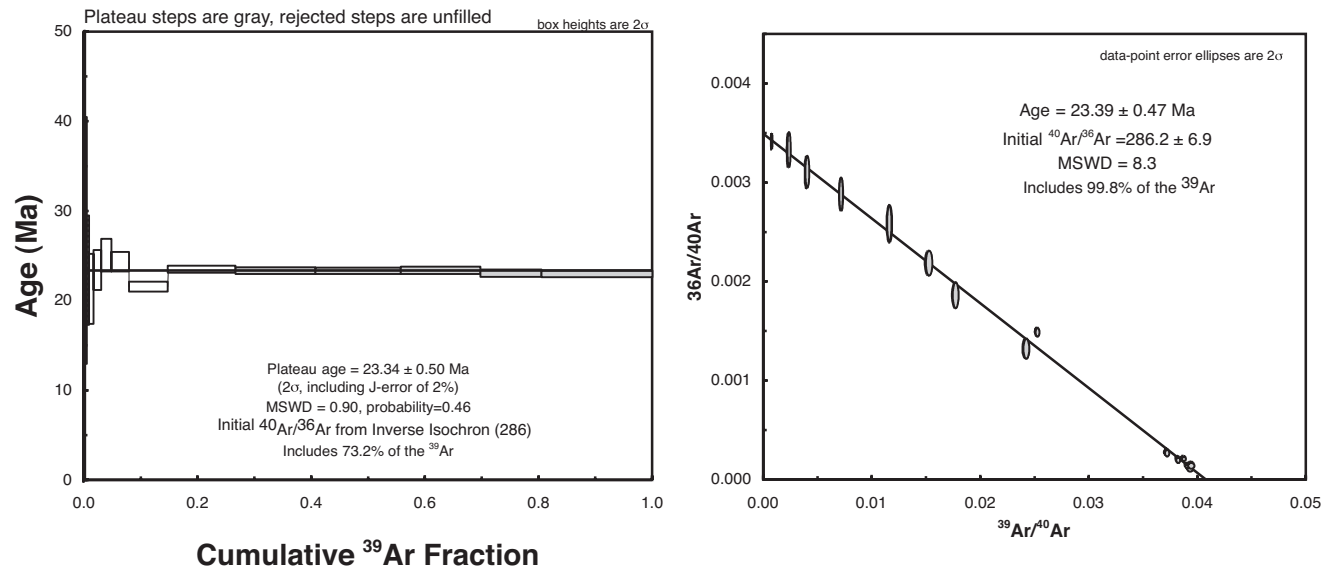

| Step | Laser<br>(#) | <sup>40</sup> Ar/ <sup>39</sup> Ar | <sup>37</sup> Ar/ <sup>39</sup> Ar | <sup>36</sup> Ar/ <sup>39</sup> Ar | <sup>39</sup> Ar <sub>K</sub><br>x 10 <sup>-15</sup> mol | K/Ca   | <sup>40</sup> Ar*<br>(%) | <sup>39</sup> Ar(%) | Age<br>(Ma) | ± 1σ |
|------|--------------|------------------------------------|------------------------------------|------------------------------------|----------------------------------------------------------|--------|--------------------------|---------------------|-------------|------|
| 1    | 1            | 30.59                              | 0.0123                             | 0.0132                             | 4.8173                                                   | 39.847 | 87.2%                    | 17.7%               | 25.13       | 0.36 |
| 2    | 2            | 27.96                              | 0.0041                             | 0.0041                             | 5.7925                                                   | 35.926 | 95.7%                    | 39.0%               | 25.20       | 0.27 |
| 3    | 3            | 30.12                              | 0.0119                             | 0.0119                             | 7.4641                                                   | 32.913 | 88.3%                    | 66.5%               | 25.07       | 0.27 |
| 4    | 4            | 27.77                              | 0.0040                             | 0.0040                             | 9.1232                                                   | 34.149 | 95.8%                    | 100.0%              | 25.05       | 0.23 |

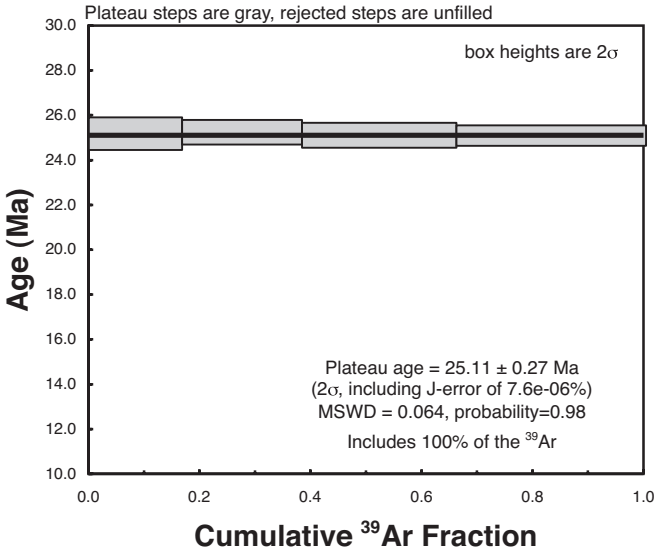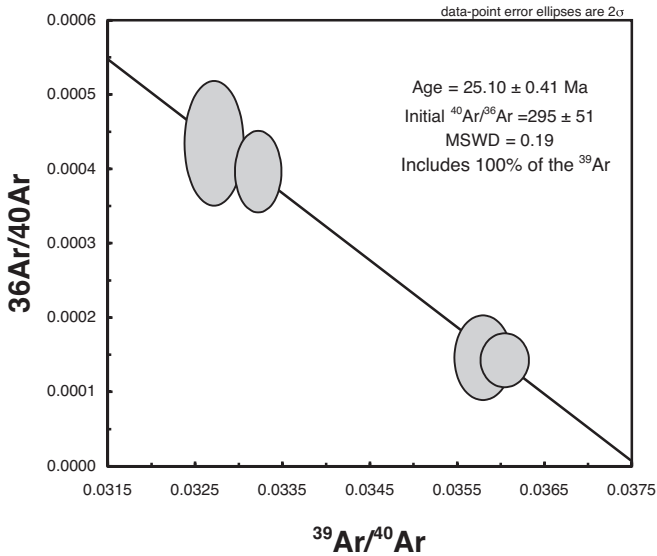

| Step | Laser<br>(#) | <sup>40</sup> Ar/ <sup>39</sup> Ar | <sup>37</sup> Ar/ <sup>39</sup> Ar | <sup>36</sup> Ar/ <sup>39</sup> Ar | <sup>39</sup> Ar <sub>K</sub><br>x 10 <sup>-15</sup> mol | K/Ca   | <sup>40</sup> Ar*<br>(%) | <sup>39</sup> Ar(%)<br>(%) | Age<br>(Ma) | ± 1σ |
|------|--------------|------------------------------------|------------------------------------|------------------------------------|----------------------------------------------------------|--------|--------------------------|----------------------------|-------------|------|
| 1    | 1            | 29.66                              | 0.0139                             | 0.0098                             | 10.8386                                                  | 35.186 | 90.2%                    | 27.3%                      | 25.33       | 0.23 |
| 2    | 2            | 28.34                              | 0.0132                             | 0.0045                             | 15.1496                                                  | 37.028 | 95.3%                    | 65.6%                      | 25.56       | 0.22 |
| 3    | 3            | 27.69                              | 0.0125                             | 0.0034                             | 6.7090                                                   | 39.056 | 96.4%                    | 82.5%                      | 25.27       | 0.25 |
| 4    | 4            | 28.27                              | 0.0128                             | 0.0049                             | 6.9403                                                   | 38.145 | 94.9%                    | 100.0%                     | 25.40       | 0.25 |

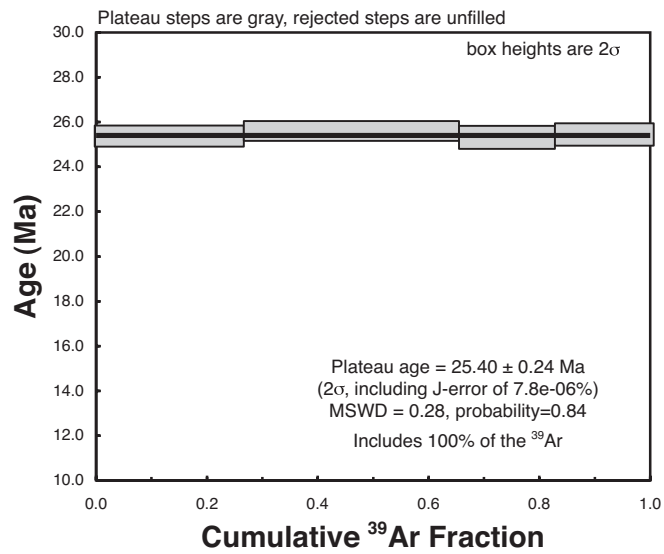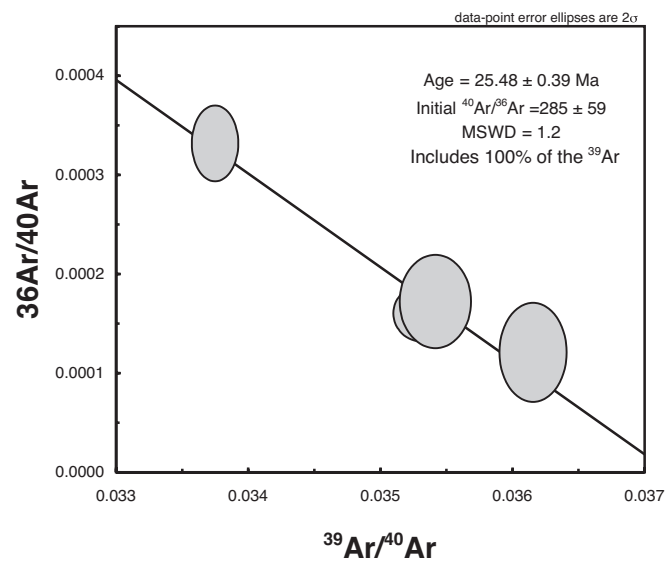

| Step | Laser<br>(#) | <sup>40</sup> Ar/ <sup>39</sup> Ar | <sup>37</sup> Ar/ <sup>39</sup> Ar | <sup>36</sup> Ar/ <sup>39</sup> Ar | <sup>39</sup> Ar <sub>K</sub><br>x 10 <sup>-15</sup> mol | K/Ca   | <sup>40</sup> Ar*<br>(%) | <sup>39</sup> Ar(%)<br>(%) | Age<br>(Ma) | ± 1σ |
|------|--------------|------------------------------------|------------------------------------|------------------------------------|----------------------------------------------------------|--------|--------------------------|----------------------------|-------------|------|
| 1    | 1            | 27.88                              | 0.0140                             | 0.0032                             | 5.1299                                                   | 34.956 | 96.6%                    | 32.8%                      | 25.53       | 0.29 |
| 2    | 2            | 28.21                              | 0.0143                             | 0.0052                             | 6.0676                                                   | 34.251 | 94.6%                    | 71.6%                      | 25.29       | 0.27 |
| 3    | 3            | 29.26                              | 0.0123                             | 0.0076                             | 4.4347                                                   | 39.813 | 92.3%                    | 100.0%                     | 25.59       | 0.38 |

DL-Tbx wrb

Total Fusion Age:  $23.8 \pm 0.1$  Ma

$J = 0.0008013 \pm 0.7\%$

| Step | Temp<br>(°C) | <sup>40</sup> Ar/ <sup>39</sup> Ar | <sup>37</sup> Ar/ <sup>39</sup> Ar | <sup>36</sup> Ar/ <sup>39</sup> Ar | <sup>39</sup> Ar <sub>K</sub><br>x 10 <sup>-15</sup> mol | K/Ca   | <sup>40</sup> Ar*<br>(%) | <sup>39</sup> Ar(%)<br>(%) | Age<br>(Ma) | ± 1σ |
|------|--------------|------------------------------------|------------------------------------|------------------------------------|----------------------------------------------------------|--------|--------------------------|----------------------------|-------------|------|
| 1    | 550          | 23.32                              | 0.1878                             | 0.0200                             | 11.0495                                                  | 2.7680 | 74.4%                    | 8.1%                       | 24.95       | 0.09 |
| 2    | 600          | 18.28                              | 0.2196                             | 0.0047                             | 10.0821                                                  | 2.3674 | 92.2%                    | 15.4%                      | 24.23       | 0.06 |
| 3    | 700          | 17.73                              | 0.3101                             | 0.0032                             | 15.5022                                                  | 1.6764 | 94.3%                    | 26.7%                      | 24.08       | 0.05 |
| 4    | 750          | 17.83                              | 0.3663                             | 0.0034                             | 11.6252                                                  | 1.4191 | 94.0%                    | 35.2%                      | 24.14       | 0.06 |
| 5    | 800          | 17.99                              | 0.4651                             | 0.0038                             | 11.0379                                                  | 1.1177 | 93.3%                    | 43.2%                      | 24.21       | 0.07 |
| 6    | 850          | 17.79                              | 0.6338                             | 0.0038                             | 10.5940                                                  | 0.8200 | 93.3%                    | 51.0%                      | 23.97       | 0.08 |
| 7    | 900          | 17.58                              | 0.7675                             | 0.0036                             | 11.0755                                                  | 0.6771 | 93.4%                    | 59.0%                      | 23.75       | 0.08 |
| 8    | 950          | 17.46                              | 0.8678                             | 0.0038                             | 11.6840                                                  | 0.5988 | 93.0%                    | 67.6%                      | 23.50       | 0.07 |
| 9    | 1000         | 17.27                              | 0.9287                             | 0.0042                             | 9.6549                                                   | 0.5595 | 92.3%                    | 74.6%                      | 23.08       | 0.09 |
| 10   | 1100         | 16.87                              | 1.0041                             | 0.0046                             | 10.0212                                                  | 0.5174 | 91.4%                    | 81.9%                      | 22.37       | 0.09 |
| 11   | 1200         | 17.43                              | 1.7225                             | 0.0044                             | 7.8464                                                   | 0.3015 | 91.7%                    | 87.6%                      | 23.31       | 0.12 |
| 12   | 1300         | 17.46                              | 2.1660                             | 0.0042                             | 16.2780                                                  | 0.2396 | 92.0%                    | 99.5%                      | 23.51       | 0.06 |
| 13   | 1400         | 26.33                              | 3.1779                             | 0.0444                             | 0.6485                                                   | 0.1632 | 49.2%                    | 100.0%                     | 19.29       | 2.08 |

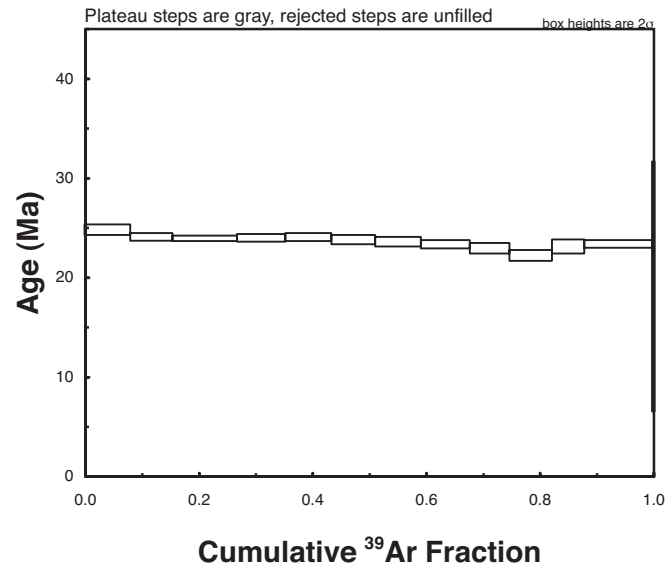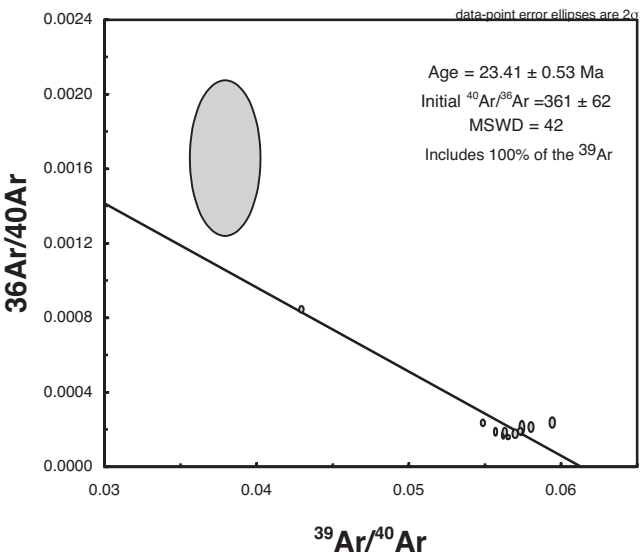

DL-Tby wrb

Total Fusion Age: 25.0 ± 0.1 Ma

J = 0.0008022 ± 0.7%

| Step | Temp<br>(°C) | <sup>40</sup> Ar/ <sup>39</sup> Ar | <sup>37</sup> Ar/ <sup>39</sup> Ar | <sup>36</sup> Ar/ <sup>39</sup> Ar | <sup>39</sup> Ar <sub>K</sub><br>x 10 <sup>-15</sup> mol | K/Ca   | <sup>40</sup> Ar*<br>(%) | <sup>39</sup> Ar(%) | Age<br>(Ma) | ± 1σ |
|------|--------------|------------------------------------|------------------------------------|------------------------------------|----------------------------------------------------------|--------|--------------------------|---------------------|-------------|------|
| 1    | 550          | 20.99                              | 0.1793                             | 0.0103                             | 20.3483                                                  | 2.8994 | 85.3%                    | 14.6%               | 25.78       | 0.04 |
| 2    | 600          | 18.86                              | 0.2082                             | 0.0030                             | 13.4079                                                  | 2.4971 | 95.0%                    | 24.3%               | 25.79       | 0.06 |
| 3    | 700          | 18.32                              | 0.3185                             | 0.0022                             | 18.7870                                                  | 1.6321 | 96.1%                    | 37.7%               | 25.37       | 0.04 |
| 4    | 750          | 18.19                              | 0.4925                             | 0.0025                             | 12.2192                                                  | 1.0554 | 95.5%                    | 46.5%               | 25.08       | 0.06 |
| 5    | 800          | 18.00                              | 0.5673                             | 0.0023                             | 9.2045                                                   | 0.9162 | 95.9%                    | 53.1%               | 24.93       | 0.08 |
| 6    | 850          | 17.92                              | 0.6468                             | 0.0021                             | 9.2985                                                   | 0.8035 | 96.0%                    | 59.8%               | 24.87       | 0.09 |
| 7    | 900          | 17.63                              | 0.7369                             | 0.0020                             | 12.2420                                                  | 0.7052 | 96.2%                    | 68.6%               | 24.54       | 0.06 |
| 8    | 950          | 17.74                              | 0.8938                             | 0.0022                             | 13.0066                                                  | 0.5813 | 95.8%                    | 78.0%               | 24.62       | 0.06 |
| 9    | 1000         | 17.69                              | 1.2302                             | 0.0025                             | 9.2076                                                   | 0.4223 | 95.2%                    | 84.6%               | 24.47       | 0.09 |
| 10   | 1100         | 17.75                              | 1.9386                             | 0.0055                             | 6.4034                                                   | 0.2678 | 89.9%                    | 89.2%               | 23.34       | 0.13 |
| 11   | 1200         | 18.03                              | 3.8833                             | 0.0057                             | 3.9705                                                   | 0.1335 | 89.1%                    | 92.1%               | 23.92       | 0.21 |
| 12   | 1300         | 18.32                              | 3.3140                             | 0.0046                             | 10.6622                                                  | 0.1565 | 91.2%                    | 99.7%               | 24.70       | 0.11 |
| 13   | 1400         | 51.21                              | 5.1281                             | 0.1204                             | 0.3612                                                   | 0.1010 | 29.8%                    | 100.0%              | 23.01       | 3.89 |

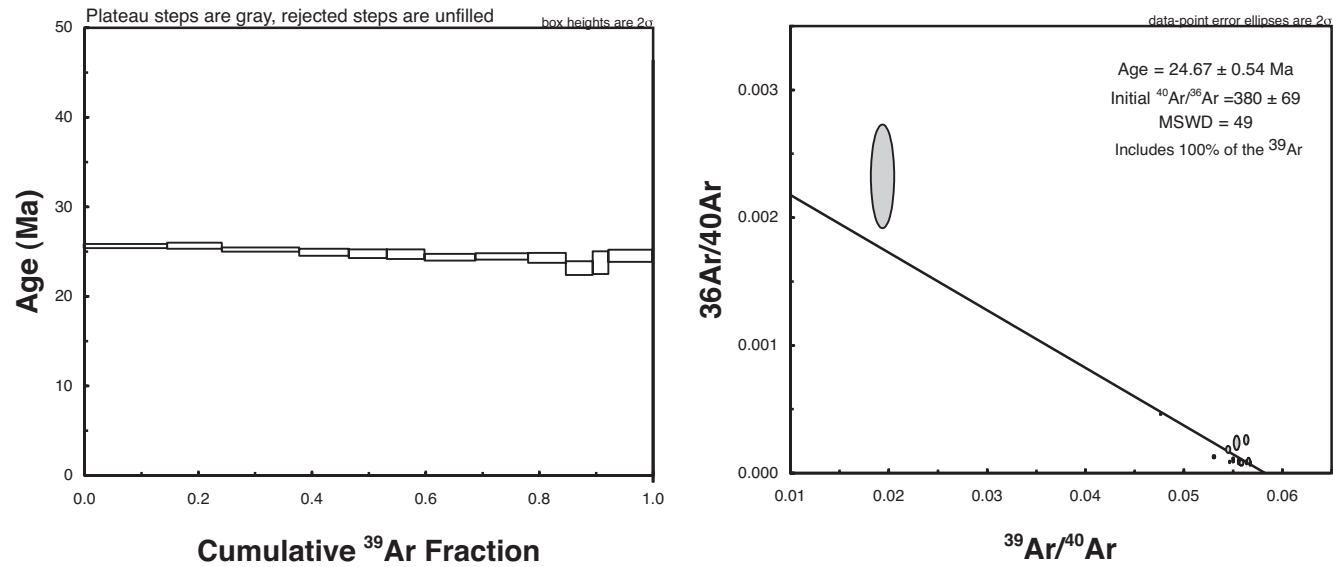

| Step | Temp<br>(°C) | <sup>40</sup> Ar/ <sup>39</sup> Ar | <sup>37</sup> Ar/ <sup>39</sup> Ar | <sup>36</sup> Ar/ <sup>39</sup> Ar | <sup>39</sup> Ar <sub>K</sub><br>x 10 <sup>-15</sup> mol | K/Ca   | <sup>40</sup> Ar*<br>(%) | <sup>39</sup> Ar(%) | Age<br>(Ma) | ± 1σ |
|------|--------------|------------------------------------|------------------------------------|------------------------------------|----------------------------------------------------------|--------|--------------------------|---------------------|-------------|------|
| 1    | 550          | 74.51                              | 1.3277                             | 0.2125                             | 2.3669                                                   | 0.3912 | 15.6%                    | 2.1%                | 16.82       | 0.65 |
| 2    | 600          | 45.56                              | 1.8882                             | 0.0913                             | 1.2546                                                   | 0.2750 | 40.5%                    | 3.2%                | 26.63       | 0.61 |
| 3    | 700          | 28.69                              | 1.4384                             | 0.0316                             | 4.6739                                                   | 0.3611 | 67.0%                    | 7.4%                | 27.63       | 0.21 |
| 4    | 750          | 22.73                              | 1.2698                             | 0.0146                             | 5.2760                                                   | 0.4091 | 80.6%                    | 12.0%               | 26.33       | 0.15 |
| 5    | 800          | 21.11                              | 1.1572                             | 0.0110                             | 6.1020                                                   | 0.4490 | 84.2%                    | 17.4%               | 25.53       | 0.13 |
| 6    | 850          | 23.57                              | 1.1186                             | 0.0211                             | 5.6999                                                   | 0.4645 | 73.1%                    | 22.5%               | 24.75       | 0.15 |
| 7    | 900          | 20.30                              | 0.8875                             | 0.0108                             | 7.8306                                                   | 0.5855 | 83.9%                    | 29.4%               | 24.43       | 0.12 |
| 8    | 950          | 17.64                              | 0.6889                             | 0.0022                             | 13.2193                                                  | 0.7544 | 95.9%                    | 41.2%               | 24.23       | 0.06 |
| 9    | 1000         | 17.48                              | 0.7089                             | 0.0015                             | 15.1267                                                  | 0.7331 | 97.0%                    | 54.6%               | 24.30       | 0.06 |
| 10   | 1100         | 17.54                              | 0.6900                             | 0.0018                             | 22.9675                                                  | 0.7532 | 96.6%                    | 74.9%               | 24.27       | 0.04 |
| 11   | 1200         | 17.86                              | 2.4921                             | 0.0035                             | 10.0992                                                  | 0.2082 | 93.1%                    | 83.9%               | 24.19       | 0.09 |
| 12   | 1300         | 17.76                              | 3.0905                             | 0.0032                             | 14.1632                                                  | 0.1678 | 93.3%                    | 96.5%               | 24.23       | 0.07 |
| 13   | 1400         | 23.04                              | 2.7817                             | 0.0217                             | 3.9772                                                   | 0.1865 | 71.3%                    | 100.0%              | 23.96       | 0.34 |

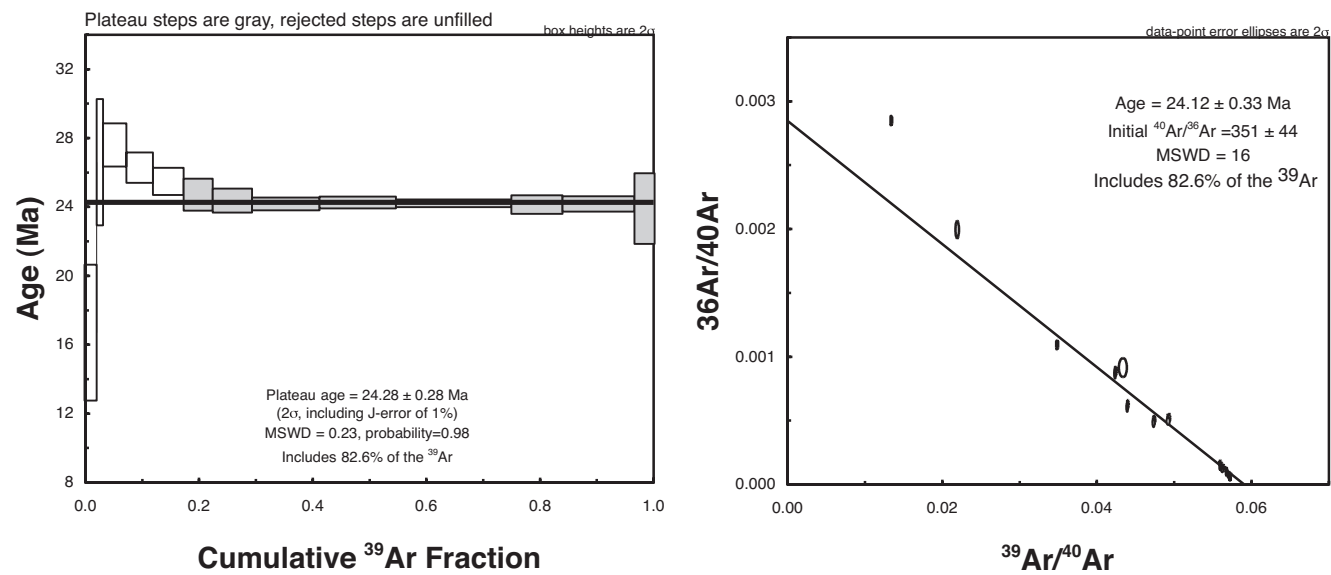

DL04-BR06 wrb

Total Fusion Age:  $26.3 \pm 0.3$  Ma $J = 0.0007896 \pm 0.5\%$ 

| Step | Temp<br>(°C) | $^{40}\text{Ar}/^{39}\text{Ar}$ | $^{37}\text{Ar}/^{39}\text{Ar}$ | $^{36}\text{Ar}/^{39}\text{Ar}$ | $^{39}\text{Ar}_K$<br>x $10^{-15}$ mol | K/Ca   | $^{40}\text{Ar}^*$<br>(%) | $^{39}\text{Ar}(\%)$<br>(%) | Age<br>(Ma) | $\pm 1\sigma$ |
|------|--------------|---------------------------------|---------------------------------|---------------------------------|----------------------------------------|--------|---------------------------|-----------------------------|-------------|---------------|
| 1    | 550          | 27.15                           | 0.1448                          | 0.0272                          | 2.7900                                 | 3.5919 | 70.2%                     | 1.3%                        | 26.99       | 0.25          |
| 2    | 600          | 20.85                           | 0.1614                          | 0.0091                          | 2.2250                                 | 3.2210 | 86.9%                     | 2.4%                        | 25.66       | 0.28          |
| 3    | 700          | 19.40                           | 0.1493                          | 0.0038                          | 4.6638                                 | 3.4831 | 93.9%                     | 4.6%                        | 25.80       | 0.14          |
| 4    | 750          | 19.04                           | 0.1777                          | 0.0020                          | 5.3185                                 | 2.9261 | 96.6%                     | 7.1%                        | 26.05       | 0.13          |
| 5    | 800          | 19.04                           | 0.2003                          | 0.0015                          | 8.0010                                 | 2.5960 | 97.5%                     | 10.9%                       | 26.30       | 0.09          |
| 6    | 850          | 19.05                           | 0.2200                          | 0.0007                          | 12.5710                                | 2.3629 | 98.6%                     | 16.9%                       | 26.61       | 0.06          |
| 7    | 900          | 18.90                           | 0.2450                          | 0.0007                          | 18.8290                                | 2.1222 | 98.7%                     | 25.9%                       | 26.43       | 0.05          |
| 8    | 950          | 18.75                           | 0.2672                          | 0.0004                          | 24.6672                                | 1.9456 | 99.1%                     | 37.6%                       | 26.33       | 0.03          |
| 9    | 1000         | 18.73                           | 0.2812                          | 0.0004                          | 26.1263                                | 1.8489 | 99.1%                     | 50.1%                       | 26.32       | 0.03          |
| 10   | 1100         | 18.60                           | 0.3040                          | 0.0005                          | 38.4773                                | 1.7099 | 98.9%                     | 68.4%                       | 26.07       | 0.02          |
| 11   | 1200         | 18.63                           | 0.3273                          | 0.0004                          | 41.6866                                | 1.5883 | 99.1%                     | 88.2%                       | 26.16       | 0.02          |
| 12   | 1300         | 18.94                           | 0.3793                          | 0.0007                          | 14.2112                                | 1.3704 | 98.6%                     | 95.0%                       | 26.49       | 0.07          |
| 13   | 1400         | 19.08                           | 0.4772                          | 0.0010                          | 10.5763                                | 1.0892 | 98.2%                     | 100.0%                      | 26.58       | 0.13          |

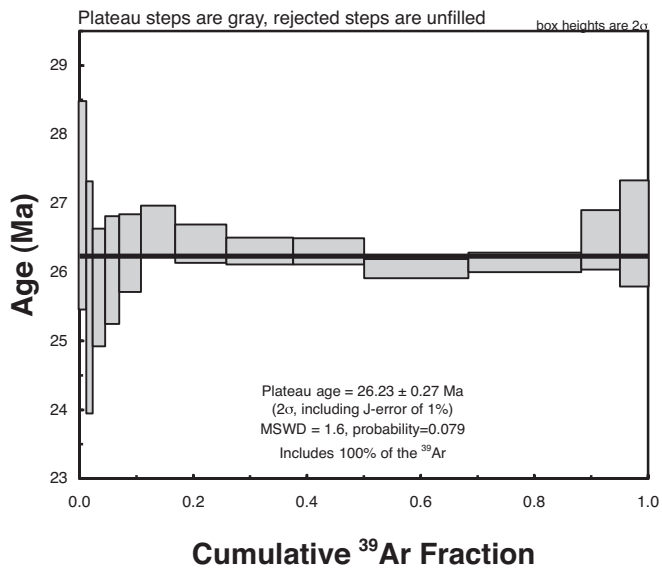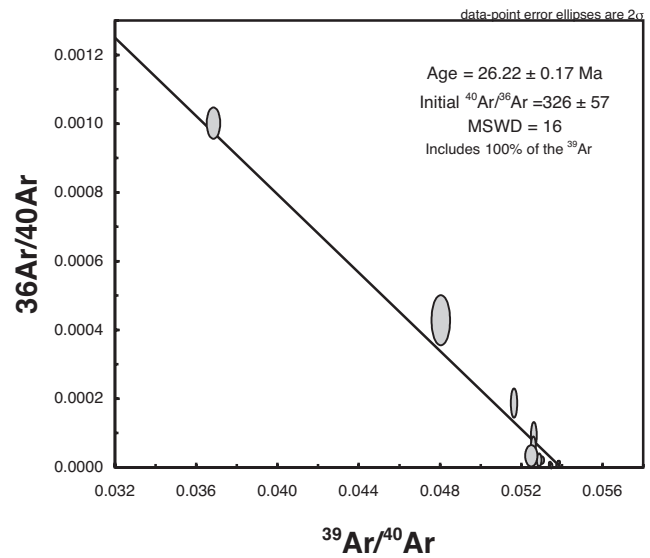

| Step | Temp<br>(°C) | <sup>40</sup> Ar/ <sup>39</sup> Ar | <sup>37</sup> Ar/ <sup>39</sup> Ar | <sup>36</sup> Ar/ <sup>39</sup> Ar | <sup>39</sup> Ar <sub>K</sub><br>x 10 <sup>-15</sup> mol | K/Ca   | <sup>40</sup> Ar*<br>(%) | <sup>39</sup> Ar(%)<br>(%) | Age<br>(Ma) | ± 1σ |
|------|--------------|------------------------------------|------------------------------------|------------------------------------|----------------------------------------------------------|--------|--------------------------|----------------------------|-------------|------|
| 1    | 550          | 23.42                              | 0.1532                             | 0.0270                             | 31.4392                                                  | 3.3929 | 65.3%                    | 13.0%                      | 21.87       | 0.04 |
| 2    | 600          | 18.20                              | 0.1673                             | 0.0105                             | 19.7809                                                  | 3.1085 | 82.5%                    | 21.1%                      | 21.48       | 0.04 |
| 3    | 700          | 16.80                              | 0.2207                             | 0.0060                             | 36.9961                                                  | 2.3555 | 89.0%                    | 36.4%                      | 21.39       | 0.02 |
| 4    | 750          | 16.46                              | 0.3305                             | 0.0045                             | 24.3346                                                  | 1.5728 | 91.5%                    | 46.4%                      | 21.57       | 0.03 |
| 5    | 800          | 16.37                              | 0.4656                             | 0.0033                             | 18.4533                                                  | 1.1164 | 93.6%                    | 54.0%                      | 21.96       | 0.04 |
| 6    | 850          | 16.24                              | 0.5160                             | 0.0024                             | 17.5695                                                  | 1.0074 | 95.3%                    | 61.3%                      | 22.20       | 0.04 |
| 7    | 900          | 16.03                              | 0.4853                             | 0.0018                             | 20.2417                                                  | 1.0710 | 96.3%                    | 69.6%                      | 22.14       | 0.04 |
| 8    | 950          | 15.91                              | 0.5974                             | 0.0016                             | 20.4757                                                  | 0.8699 | 96.5%                    | 78.1%                      | 22.06       | 0.04 |
| 9    | 1000         | 15.80                              | 0.9194                             | 0.0020                             | 13.1886                                                  | 0.5652 | 95.7%                    | 83.5%                      | 21.78       | 0.05 |
| 10   | 1100         | 15.48                              | 1.4646                             | 0.0032                             | 10.2118                                                  | 0.3546 | 92.9%                    | 87.8%                      | 20.85       | 0.07 |
| 11   | 1200         | 15.84                              | 2.6211                             | 0.0044                             | 7.3080                                                   | 0.1980 | 90.4%                    | 90.8%                      | 20.99       | 0.11 |
| 12   | 1300         | 16.16                              | 1.5640                             | 0.0036                             | 18.5782                                                  | 0.3320 | 92.5%                    | 98.4%                      | 21.67       | 0.06 |
| 13   | 1400         | 22.64                              | 1.8666                             | 0.0256                             | 3.7587                                                   | 0.2782 | 65.5%                    | 100.0%                     | 21.58       | 0.44 |

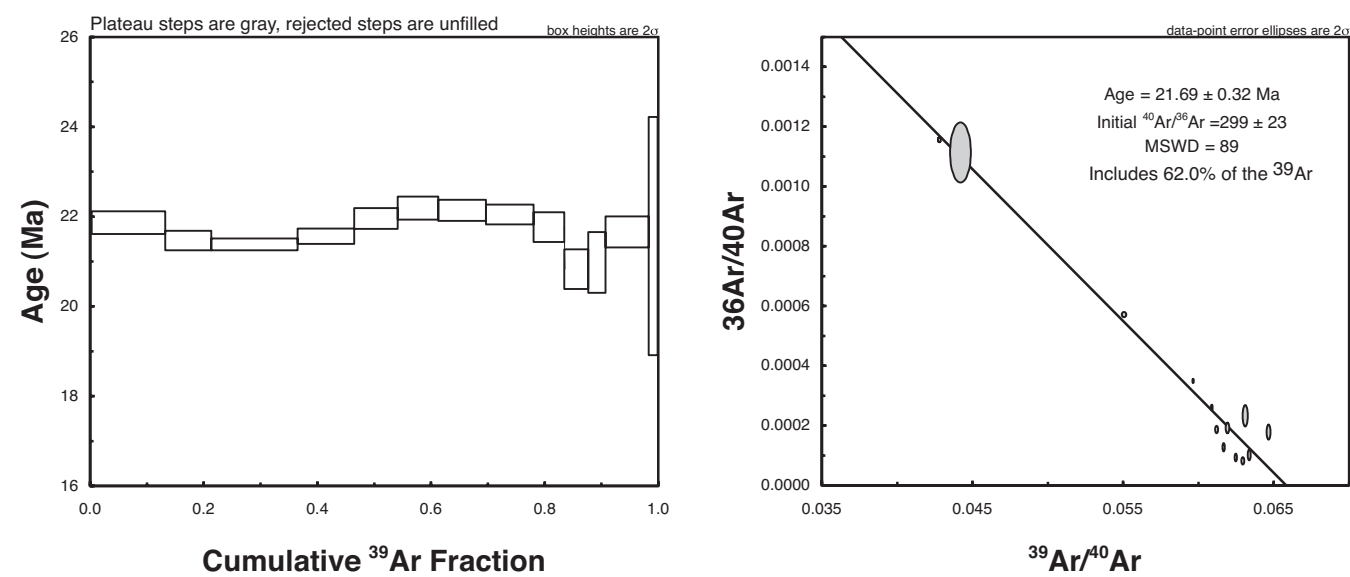

DL04-BR09 anc

Total Fusion Age: 26.7 ± 0.8 Ma

J = 0.0007879 ± 0.5%

| Step | Temp<br>(°C) | <sup>40</sup> Ar/ <sup>39</sup> Ar | <sup>37</sup> Ar/ <sup>39</sup> Ar | <sup>36</sup> Ar/ <sup>39</sup> Ar | <sup>39</sup> Ar <sub>K</sub><br>x 10 <sup>-15</sup> mol | K/Ca   | <sup>40</sup> Ar*<br>(%) | <sup>39</sup> Ar(%)<br>(%) | Age<br>(Ma) | ± 1σ   |
|------|--------------|------------------------------------|------------------------------------|------------------------------------|----------------------------------------------------------|--------|--------------------------|----------------------------|-------------|--------|
| 1    | 600          | 13324.77                           | 6.6842                             | 45.0708                            | 0.1587                                                   | 0.0774 | 0.0%                     | 0.2%                       | 9.62        | 363.58 |
| 2    | 700          | 2057.31                            | 3.4352                             | 6.9695                             | 0.2937                                                   | 0.1510 | -0.1%                    | 0.5%                       | -2.81       | 24.42  |
| 3    | 750          | 1417.19                            | 2.7768                             | 4.7776                             | 0.4073                                                   | 0.1868 | 0.4%                     | 0.9%                       | 7.93        | 15.55  |
| 4    | 800          | 963.03                             | 1.6079                             | 3.2345                             | 0.6874                                                   | 0.3230 | 0.7%                     | 1.7%                       | 10.39       | 8.27   |
| 5    | 850          | 672.70                             | 1.1687                             | 2.2299                             | 1.1412                                                   | 0.4445 | 2.0%                     | 2.9%                       | 19.57       | 3.58   |
| 6    | 900          | 473.22                             | 0.8286                             | 1.5431                             | 1.8154                                                   | 0.6271 | 3.6%                     | 4.9%                       | 24.40       | 2.07   |
| 7    | 950          | 332.26                             | 0.5970                             | 1.0575                             | 2.8041                                                   | 0.8706 | 5.9%                     | 8.0%                       | 27.89       | 0.97   |
| 8    | 1000         | 233.77                             | 0.4171                             | 0.7226                             | 4.1463                                                   | 1.2463 | 8.6%                     | 12.5%                      | 28.55       | 0.60   |
| 9    | 1050         | 159.08                             | 0.3441                             | 0.4687                             | 5.8428                                                   | 1.5108 | 12.9%                    | 18.9%                      | 29.01       | 0.39   |
| 10   | 1100         | 102.77                             | 0.2689                             | 0.2792                             | 7.9587                                                   | 1.9331 | 19.7%                    | 27.6%                      | 28.55       | 0.24   |
| 11   | 1150         | 71.19                              | 0.2127                             | 0.1750                             | 10.0602                                                  | 2.4439 | 27.3%                    | 38.7%                      | 27.47       | 0.14   |
| 12   | 1200         | 44.95                              | 0.1330                             | 0.0878                             | 15.7551                                                  | 3.9102 | 42.2%                    | 55.9%                      | 26.79       | 0.09   |
| 13   | 1250         | 35.73                              | 0.0986                             | 0.0574                             | 21.4440                                                  | 5.2751 | 52.5%                    | 79.4%                      | 26.47       | 0.07   |
| 14   | 1300         | 42.69                              | 0.1774                             | 0.0800                             | 9.9322                                                   | 2.9313 | 44.5%                    | 90.2%                      | 26.84       | 0.12   |
| 15   | 1350         | 35.44                              | 0.3131                             | 0.0562                             | 5.1966                                                   | 1.6605 | 53.0%                    | 95.9%                      | 26.57       | 0.14   |
| 16   | 1400         | 32.11                              | 0.4088                             | 0.0468                             | 2.9414                                                   | 1.2715 | 56.8%                    | 99.1%                      | 25.83       | 0.21   |
| 17   | 1500         | 73.11                              | 1.6219                             | 0.1896                             | 0.7858                                                   | 0.3202 | 23.2%                    | 100.0%                     | 24.26       | 0.83   |

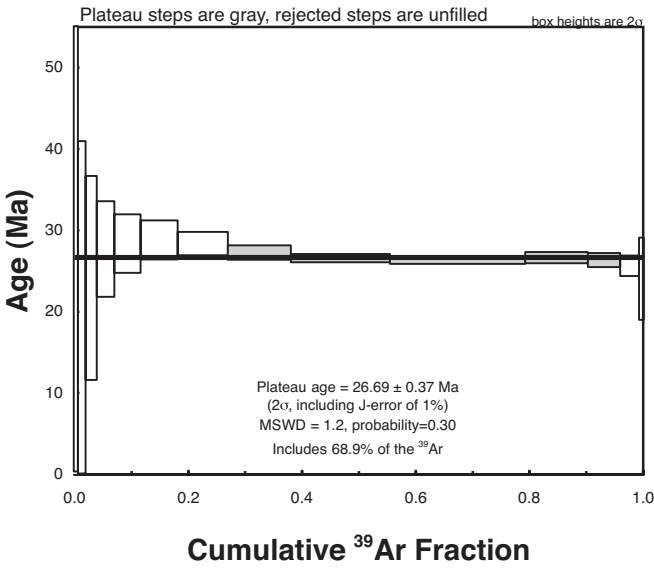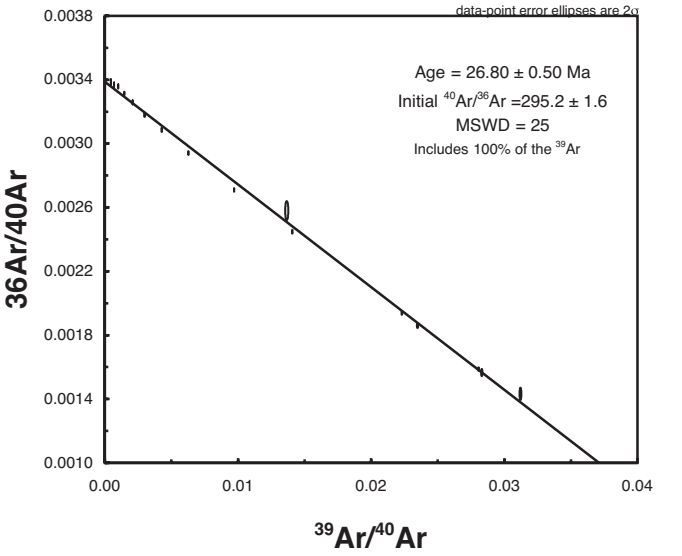

| Step | Temp<br>(°C) | <sup>40</sup> Ar/ <sup>39</sup> Ar | <sup>37</sup> Ar/ <sup>39</sup> Ar | <sup>36</sup> Ar/ <sup>39</sup> Ar | <sup>39</sup> Ar <sub>K</sub><br>x 10 <sup>-15</sup> mol | K/Ca   | <sup>40</sup> Ar*<br>(%) | <sup>39</sup> Ar(%)<br>(%) | Age<br>(Ma) | ± 1σ |
|------|--------------|------------------------------------|------------------------------------|------------------------------------|----------------------------------------------------------|--------|--------------------------|----------------------------|-------------|------|
| 1    | 550          | 53.93                              | 0.8575                             | 0.1318                             | 1.1056                                                   | 0.6060 | 27.6%                    | 1.1%                       | 21.48       | 0.86 |
| 2    | 600          | 21.74                              | 0.2299                             | 0.0173                             | 14.7791                                                  | 2.2612 | 76.3%                    | 15.2%                      | 23.77       | 0.05 |
| 3    | 700          | 17.06                              | 0.3222                             | 0.0032                             | 17.1140                                                  | 1.6135 | 94.1%                    | 31.6%                      | 23.03       | 0.04 |
| 4    | 750          | 16.83                              | 0.4930                             | 0.0023                             | 10.9665                                                  | 1.0543 | 95.5%                    | 42.0%                      | 23.11       | 0.06 |
| 5    | 800          | 16.95                              | 0.6533                             | 0.0020                             | 8.6165                                                   | 0.7956 | 96.0%                    | 50.3%                      | 23.42       | 0.08 |
| 6    | 850          | 16.98                              | 0.6671                             | 0.0018                             | 9.4089                                                   | 0.7791 | 96.5%                    | 59.3%                      | 23.57       | 0.08 |
| 7    | 900          | 16.96                              | 0.6322                             | 0.0015                             | 11.1683                                                  | 0.8221 | 96.9%                    | 70.0%                      | 23.63       | 0.07 |
| 8    | 950          | 16.87                              | 0.7487                             | 0.0017                             | 10.4750                                                  | 0.6941 | 96.5%                    | 80.0%                      | 23.45       | 0.07 |
| 9    | 1000         | 16.75                              | 1.1242                             | 0.0026                             | 6.4386                                                   | 0.4621 | 94.7%                    | 86.1%                      | 22.93       | 0.11 |
| 10   | 1050         | 16.50                              | 1.5686                             | 0.0037                             | 3.4949                                                   | 0.3311 | 92.5%                    | 89.5%                      | 22.17       | 0.20 |
| 11   | 1100         | 16.48                              | 2.0172                             | 0.0055                             | 2.6077                                                   | 0.2574 | 89.2%                    | 92.0%                      | 21.45       | 0.28 |
| 12   | 1150         | 17.09                              | 3.7892                             | 0.0075                             | 1.9277                                                   | 0.1368 | 85.4%                    | 93.8%                      | 21.68       | 0.38 |
| 13   | 1200         | 16.79                              | 6.4996                             | 0.0089                             | 1.1394                                                   | 0.0796 | 81.5%                    | 94.9%                      | 20.94       | 0.70 |
| 14   | 1300         | 18.06                              | 4.4985                             | 0.0070                             | 4.8254                                                   | 0.1152 | 86.7%                    | 99.6%                      | 23.33       | 0.22 |
| 15   | 1400         | 41.25                              | 4.4363                             | 0.0975                             | 0.4553                                                   | 0.1168 | 29.4%                    | 100.0%                     | 18.26       | 3.62 |

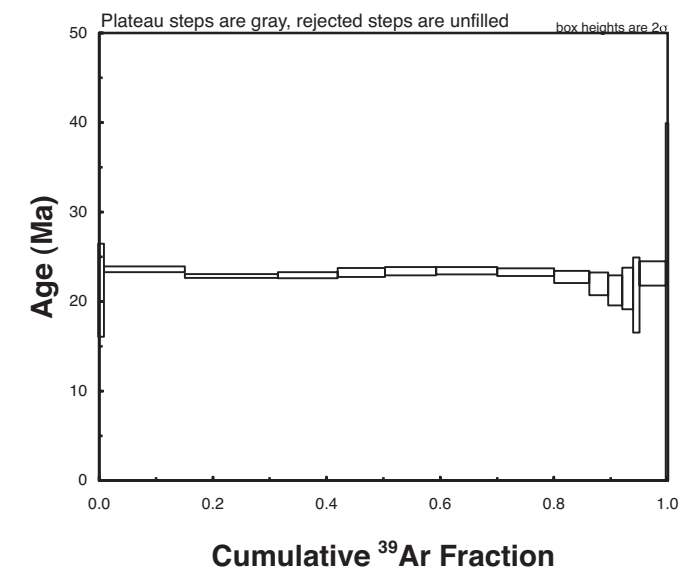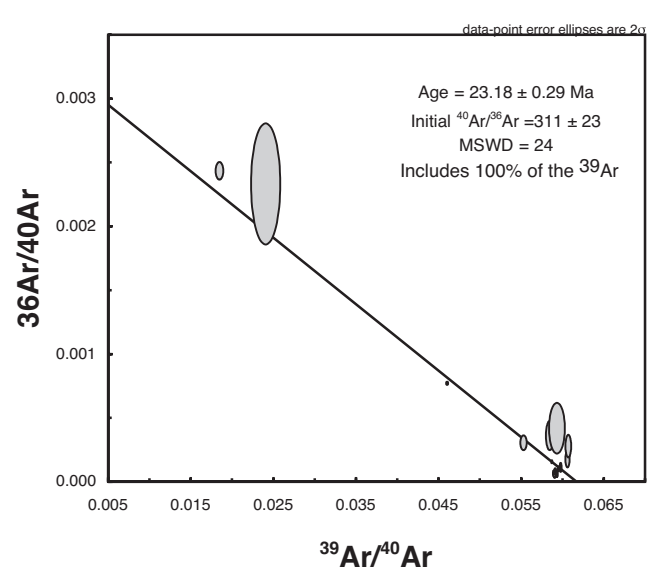

| Step | Laser<br>(#) | <sup>40</sup> Ar/ <sup>39</sup> Ar | <sup>37</sup> Ar/ <sup>39</sup> Ar | <sup>36</sup> Ar/ <sup>39</sup> Ar | <sup>39</sup> Ar <sub>K</sub><br>x 10 <sup>-15</sup> mol | K/Ca    | <sup>40</sup> Ar*<br>(%) | <sup>39</sup> Ar(%)<br>(%) | Age<br>(Ma) | ± 1σ |
|------|--------------|------------------------------------|------------------------------------|------------------------------------|----------------------------------------------------------|---------|--------------------------|----------------------------|-------------|------|
| 1    | 1            | 19.03                              | 0.0425                             | 0.0019                             | 3.7046                                                   | 12.2410 | 96.3%                    | 8.1%                       | 26.27       | 0.22 |
| 2    | 2            | 18.83                              | 0.0552                             | 0.0022                             | 3.4448                                                   | 9.4277  | 95.8%                    | 15.6%                      | 25.85       | 0.25 |
| 3    | 3            | 19.00                              | 0.0499                             | 0.0021                             | 5.8993                                                   | 10.4114 | 95.8%                    | 28.4%                      | 26.10       | 0.14 |
| 4    | 4            | 18.96                              | 0.0352                             | 0.0022                             | 10.0167                                                  | 14.7646 | 95.8%                    | 50.3%                      | 26.04       | 0.09 |
| 5    | 5            | 19.51                              | 0.0235                             | 0.0037                             | 22.8252                                                  | 22.1059 | 93.1%                    | 100.0%                     | 26.03       | 0.04 |

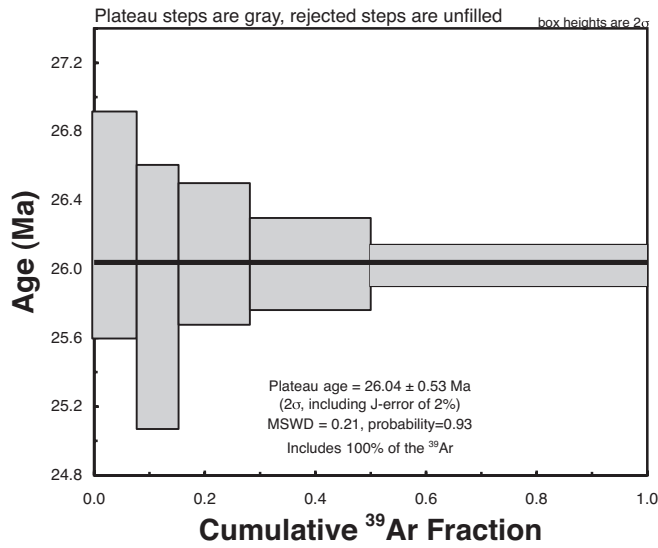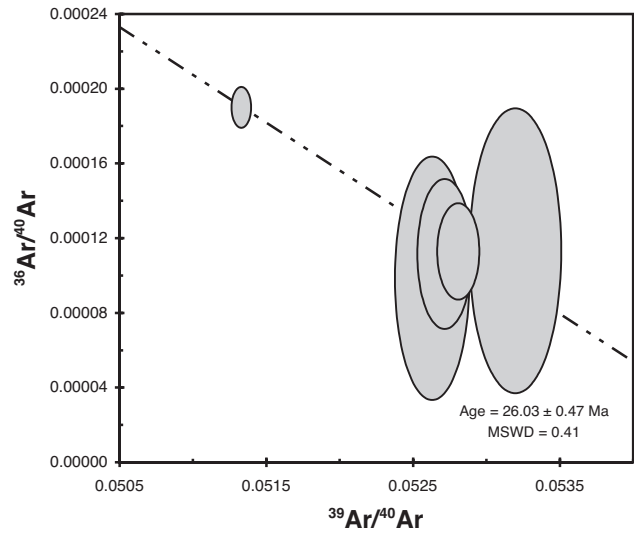

DL04-BR17 wrb

Total Fusion Age: 23.4 ± 0.1 Ma

J = 0.0007927 ± 0.5%

| Step | Temp<br>(°C) | <sup>40</sup> Ar/ <sup>39</sup> Ar | <sup>37</sup> Ar/ <sup>39</sup> Ar | <sup>36</sup> Ar/ <sup>39</sup> Ar | <sup>39</sup> Ar <sub>K</sub><br>x 10 <sup>-15</sup> mol | K/Ca   | <sup>40</sup> Ar*<br>(%) | <sup>39</sup> Ar(%)<br>(%) | Age<br>(Ma) | ± 1σ |
|------|--------------|------------------------------------|------------------------------------|------------------------------------|----------------------------------------------------------|--------|--------------------------|----------------------------|-------------|------|
| 1    | 550          | 50.77                              | 0.2692                             | 0.1158                             | 24.3187                                                  | 1.9309 | 32.5%                    | 18.4%                      | 23.51       | 0.08 |
| 2    | 600          | 31.86                              | 0.3682                             | 0.0529                             | 11.7007                                                  | 1.4119 | 50.8%                    | 27.3%                      | 23.07       | 0.08 |
| 3    | 700          | 27.47                              | 0.7447                             | 0.0374                             | 15.5882                                                  | 0.6978 | 59.5%                    | 39.2%                      | 23.36       | 0.06 |
| 4    | 750          | 23.26                              | 1.2845                             | 0.0219                             | 9.8214                                                   | 0.4044 | 71.7%                    | 46.6%                      | 23.97       | 0.08 |
| 5    | 800          | 19.82                              | 1.6413                             | 0.0101                             | 10.6396                                                  | 0.3164 | 84.2%                    | 54.7%                      | 24.04       | 0.08 |
| 6    | 850          | 18.32                              | 1.4966                             | 0.0051                             | 12.0332                                                  | 0.3470 | 91.1%                    | 63.8%                      | 24.02       | 0.06 |
| 7    | 900          | 17.89                              | 0.9771                             | 0.0041                             | 9.9282                                                   | 0.5318 | 92.7%                    | 71.4%                      | 23.76       | 0.07 |
| 8    | 950          | 17.64                              | 0.7754                             | 0.0034                             | 9.2661                                                   | 0.6702 | 93.8%                    | 78.4%                      | 23.68       | 0.08 |
| 9    | 1000         | 17.43                              | 1.1513                             | 0.0038                             | 7.7279                                                   | 0.4512 | 93.0%                    | 84.3%                      | 23.27       | 0.09 |
| 10   | 1100         | 17.13                              | 2.1350                             | 0.0052                             | 8.8267                                                   | 0.2431 | 90.1%                    | 91.0%                      | 22.38       | 0.09 |
| 11   | 1200         | 17.90                              | 9.5355                             | 0.0118                             | 3.3657                                                   | 0.0541 | 76.8%                    | 93.5%                      | 21.50       | 0.24 |
| 12   | 1300         | 18.69                              | 6.1671                             | 0.0107                             | 7.6457                                                   | 0.0839 | 80.7%                    | 99.4%                      | 22.70       | 0.13 |
| 13   | 1400         | 70.78                              | 6.2564                             | 0.1926                             | 0.8403                                                   | 0.0827 | 19.0%                    | 100.0%                     | 20.38       | 1.71 |

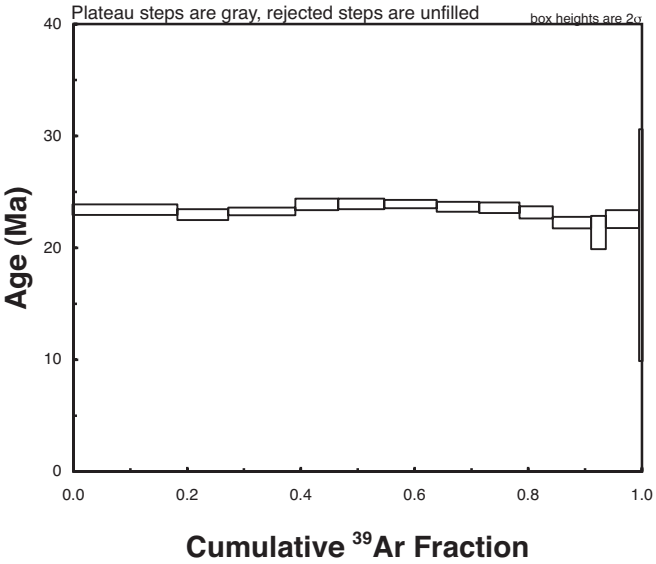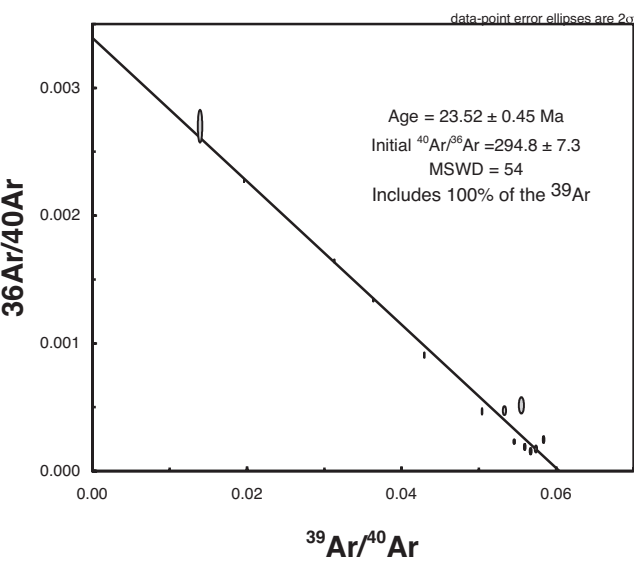

| Step | Laser (#) | <sup>40</sup> Ar/ <sup>39</sup> Ar | <sup>37</sup> Ar/ <sup>39</sup> Ar | <sup>36</sup> Ar/ <sup>39</sup> Ar | <sup>39</sup> Ar <sub>K</sub><br>x 10 <sup>-15</sup> mol | K/Ca   | <sup>40</sup> Ar* (%) | <sup>39</sup> Ar(%) | Age (Ma) | ± 1σ |
|------|-----------|------------------------------------|------------------------------------|------------------------------------|----------------------------------------------------------|--------|-----------------------|---------------------|----------|------|
| 1    | 1         | 12.07                              | 0.0870                             | 0.0026                             | 9.5070                                                   | 5.9739 | 93.4%                 | 10.7%               | 16.21    | 0.09 |
| 2    | 2         | 12.14                              | 0.0694                             | 0.0030                             | 4.3235                                                   | 7.4882 | 92.5%                 | 15.6%               | 16.13    | 0.19 |
| 3    | 3         | 12.23                              | 0.0538                             | 0.0030                             | 19.6809                                                  | 9.6627 | 92.4%                 | 37.8%               | 16.25    | 0.05 |
| 4    | 4         | 12.15                              | 0.0561                             | 0.0028                             | 28.6872                                                  | 9.2713 | 92.9%                 | 70.2%               | 16.22    | 0.03 |
| 5    | 5         | 12.14                              | 0.0565                             | 0.0028                             | 26.3538                                                  | 9.2001 | 92.9%                 | 100.0%              | 16.21    | 0.03 |

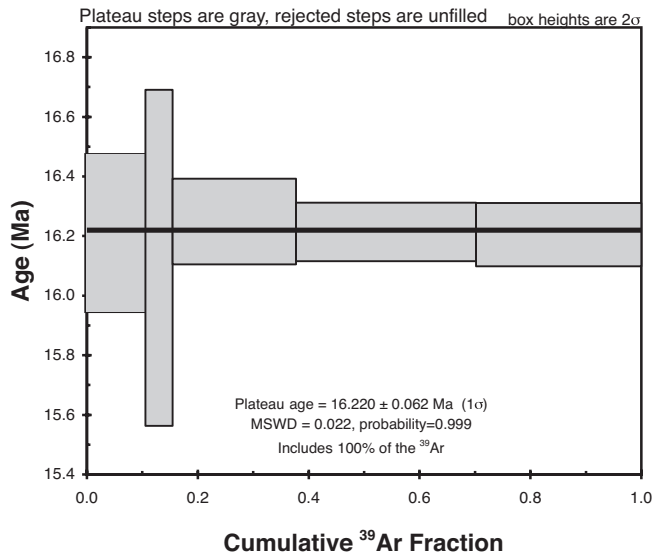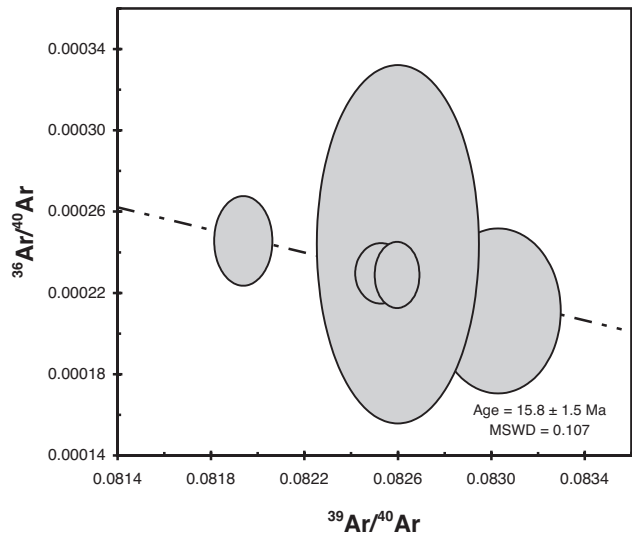

**DATA REPOSITORY ITEM 2 (DR-2), RECALCULATED  $^{40}\text{Ar}/^{39}\text{Ar}$  AGES**

| Reference              | Unit                | Cited Age      | Laboratory       | Standard                 | Age TCs <sup>4</sup> = 27.92 |
|------------------------|---------------------|----------------|------------------|--------------------------|------------------------------|
| Henry and Castor, 2000 | Idaho Canyon Tuff   | 16.30 ± 0.06   | NMT <sup>1</sup> | FCT <sup>3</sup> = 27.84 | 16.12 ± 0.06                 |
| Swisher, 1990          | Idaho Canyon Tuff   | 16.48 ± 0.04   | BGC <sup>2</sup> | FCT = 27.84              | 16.30 ± 0.04                 |
| Swisher, 1990          | Steens Basalt (top) | 16.583 ± 0.048 | BGC              | FCT = 27.84              | 16.40 ± 0.05                 |
| Swisher, 1990          | Steens Basalt       | 16.589 ± 0.022 | BGC              | FCT = 27.84              | 16.41 ± 0.02                 |
| Swisher, 1990          | Ashdown Tuff        | 26.55 ± 0.03   | BGC              | FCT = 27.84              | 26.26 ± 0.03                 |

<sup>1</sup>New Mexico Tech<sup>2</sup>Berkeley Geochronology Center<sup>3</sup>Fish Canyon Tuff<sup>4</sup>Taylor Creek Rhyolite

### **DATA REPOSITORY ITEM 3 (DR-3), SEISMIC DATA ACQUISITION AND PROCESSING**

Recording in the Black Rock Range and Black Rock Desert was completed using single channel RefTek 125A seismographs spaced every 100 m. Source gathers from nine pad locations were produced by summing ten individual one-minute sweeps (10 min. total source effort). The gathers show clear first arrivals to offsets of ~25 km, with visible arrivals beyond this distance usually confined to regions of above average signal - noise ratio (see Data Repository Item 3 for a representative source gather). A bandpass filter (corner frequencies of 2, 4, 24, and 30 Hz) and a minimum phase predictive deconvolution (500 ms operator length, 50 ms prediction distance, 0.1% pre-whitening) were applied to all source gathers. A total of 515 picks were made from the vibrator-source gathers, illuminating the surface velocities in the vicinity of the Black Rock and Pine Forest Ranges (Figure 9). These picks were incorporated into the larger-scale refraction experiment (Lerch et al. (2007)) through forward modeling with Modeling (a GUI by Gou Fujie based on Colin Zelt's RayInvr, Zelt and Smith (1992)).

#### **References**

- Lerch, D.W., Klemperer, S.L., Glen, J.M.G., Ponce, D.A., Miller, E.L., and Colgan, J.P., 2007, Crustal structure of the northwestern Basin and Range and its transition to unextended volcanic plateaus: *Geochemistry, Geophysics, and Geosystems*, v. 8, doi: 10.1029/2006GC001429.
- Zelt, C.A. and Smith, R.B., 1992, Seismic traveltime inversion for 2-D crustal velocity structure: *Geophysical Journal International*, v. 108, no. 1, p. 16-34.

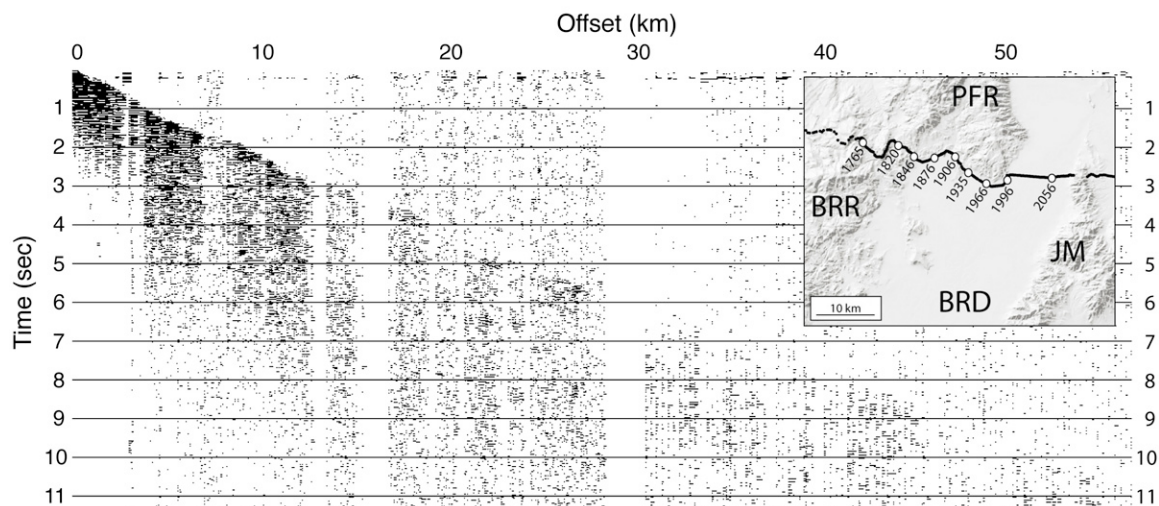

Sample vibrator gather (SP 1820) used for velocity modeling from the Black Rock Range. Coherent arrivals visible to offsets of ~25 km, with arrivals beyond this distance usually restricted to above average signal-noise regions. Inset figure shows vibrator locations (white circles), receiver locations (black line), Black Rock Desert (BRD), Black Rock Range (BRR), Pine Forest Range (PFR), and Jackson Mountains (JM).
